# Supplementary material for: A Casparian strip domain-like gene, CASPL, negatively alters growth and cold tolerance
Source: PubMed Central journal article supplement (PMC4585827; doi:10.1038/srep14299), 2015-09-24
Supplement: srep14299-s1.pdf [file srep14299-s1.pdf]

# **A Casparian strip domain-like gene, *CASPL*, negatively alters growth and cold tolerance**

Jinghua Yang<sup>1,2§</sup>, Changqing Ding<sup>1,2§</sup>, Baochen Xu<sup>1,2</sup>, Cuiting Chen<sup>1,2</sup>, Reena Narsai<sup>3</sup>, Jim Whelan<sup>3</sup>,  
Zhongyuan Hu<sup>1,2</sup> and Mingfang Zhang<sup>1,2\*</sup>

<sup>1</sup>Laboratory of Germplasm Innovation and Molecular Breeding, Institute of Vegetable Science, Zhejiang University, Hangzhou, 310058, P. R. China.

<sup>2</sup>Key laboratory of Horticultural Plant Growth, Development & Quality Improvement, Ministry of Agriculture, Hangzhou, 310058, P. R. China.

<sup>3</sup>Department of Animal, Plant and Soil Science, School of Life Science, Australian Research Council Centre of Excellence in Plant Energy Biology, LaTrobe University, Bundoora, Victoria 3086, Australian.

<sup>§</sup> These authors contributed equally to this work

\*Corresponding author: mfzhang@zju.edu.cn

## Supplementary Figures Legends

**Supplementary Figure 1.** Construction of *OX-CICASPL*. **A)** Amplification of *CICASPL* gene from *Citrullus lanatus*. **B)** Schematic construction of *OX-CICASPL*. **C)** Enzyme digestion checking of construction. **D)** PCR checking of *OX-CICASPL*. **E)** RT-PCR checking of *OX-CICASPL*.

**Supplementary Figure 2.** Identification of *AtCASPL4C1* knockout-mutant in *Arabidopsis*. **A)** Homozygous *AtCASPL4C1* mutant. **B)** *AtCASPL4C1* expression in WT and *AtCASPL4C1* of *Arabidopsis*. **C)** T-DNA insertion position.

**Supplementary Figure 3.** Casparian strip staining and transcript abundance of *AtCASP1/2/3/4/5* expressions in roots. **A)** Casparian strip staining of wild type, *Atcaspl4c1* and *OX-CICASPL*. **B)** Relative transcript abundance of *AtCASP1/2/3/4/5* in wild type, *AtCASPL4C1* and *OX-CICASPL* plants. The star shows significance at 0.05 by Tukey test.

**Supplementary Figure 4.** Top ten stresses resulting in significant up-regulation/down-regulation of the greatest number of CASP and CASP-like genes.

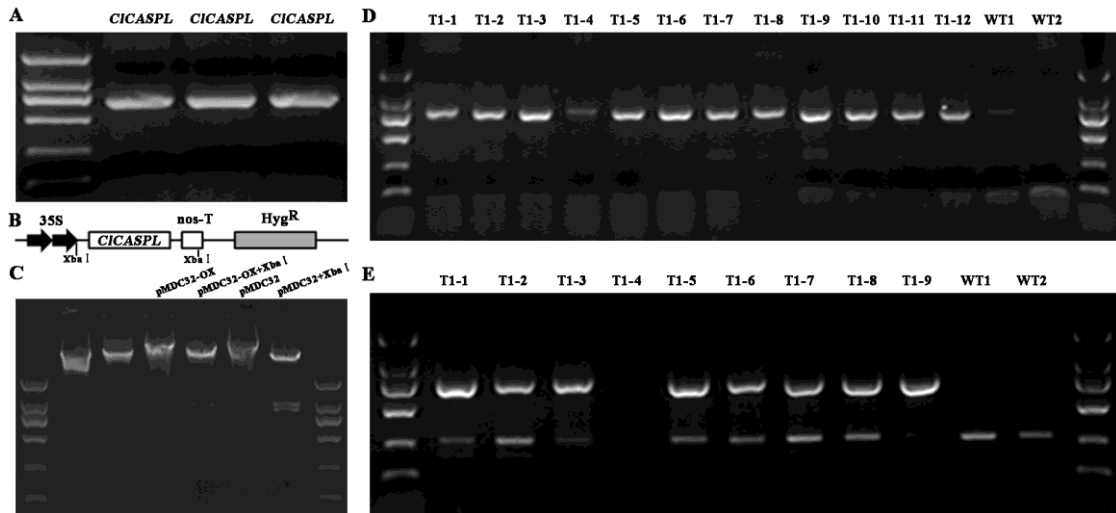

Figure 1

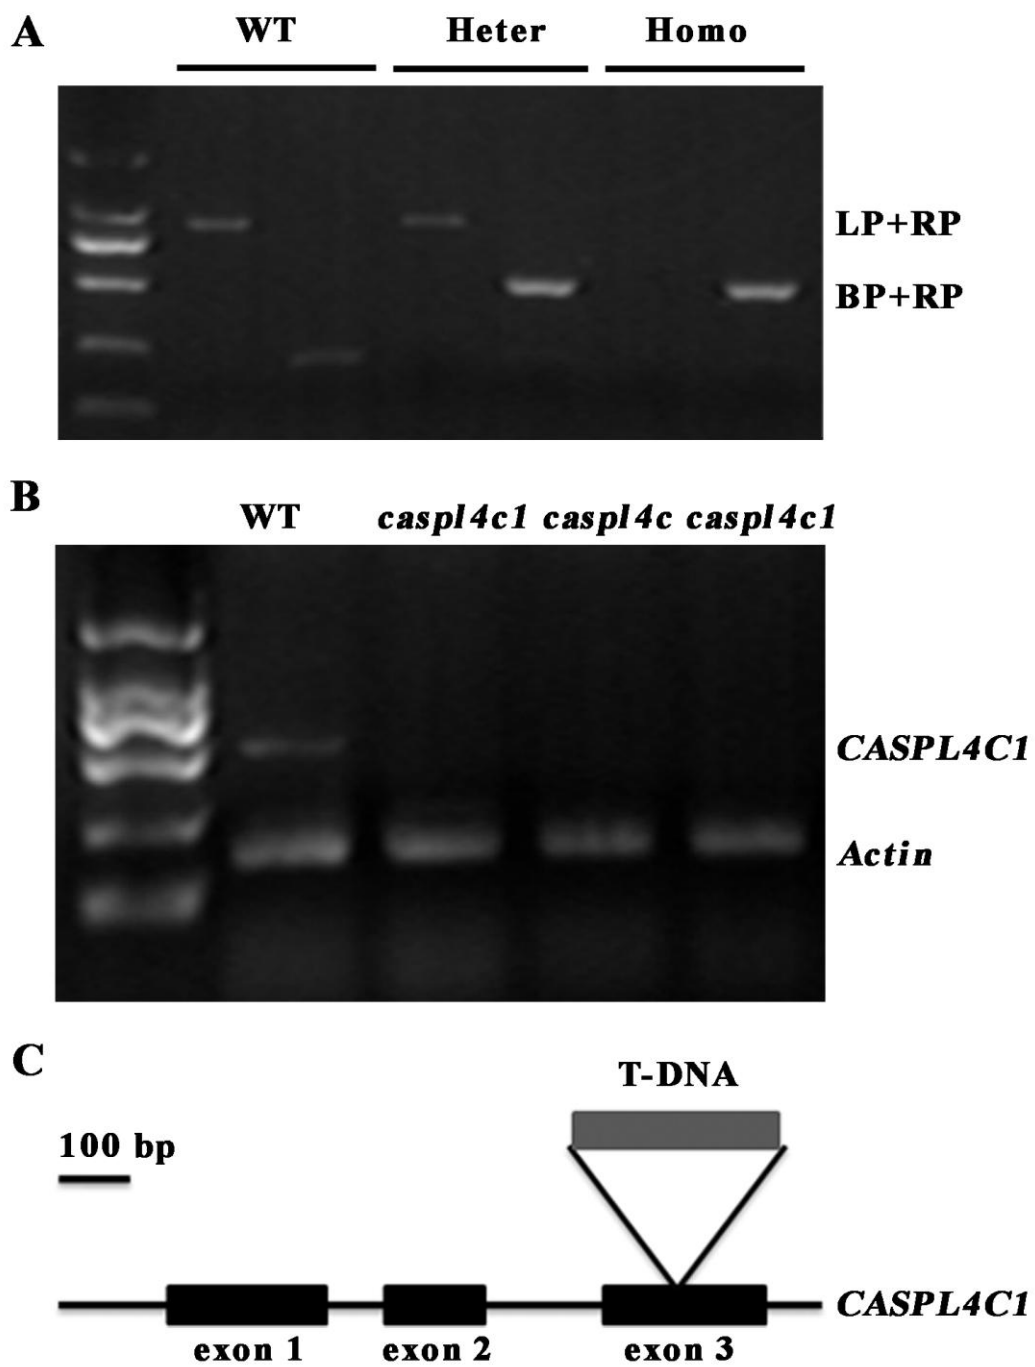

Figure 2

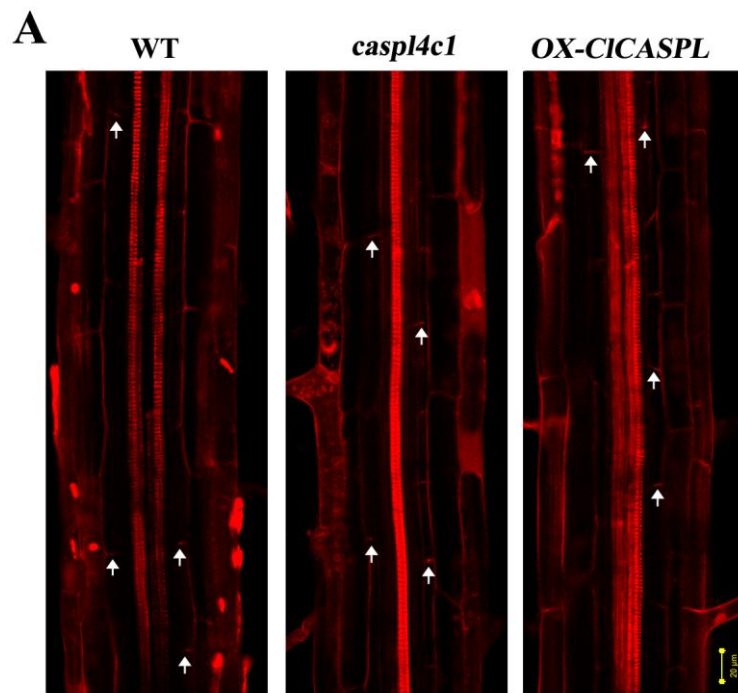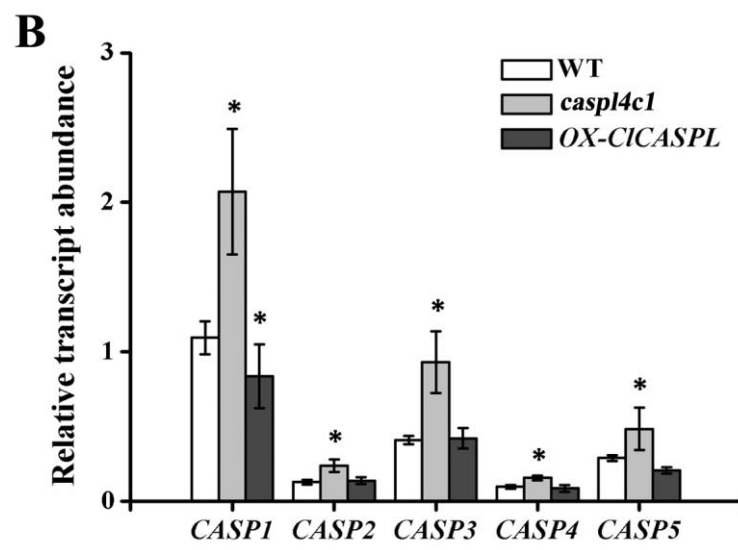

Figure 3

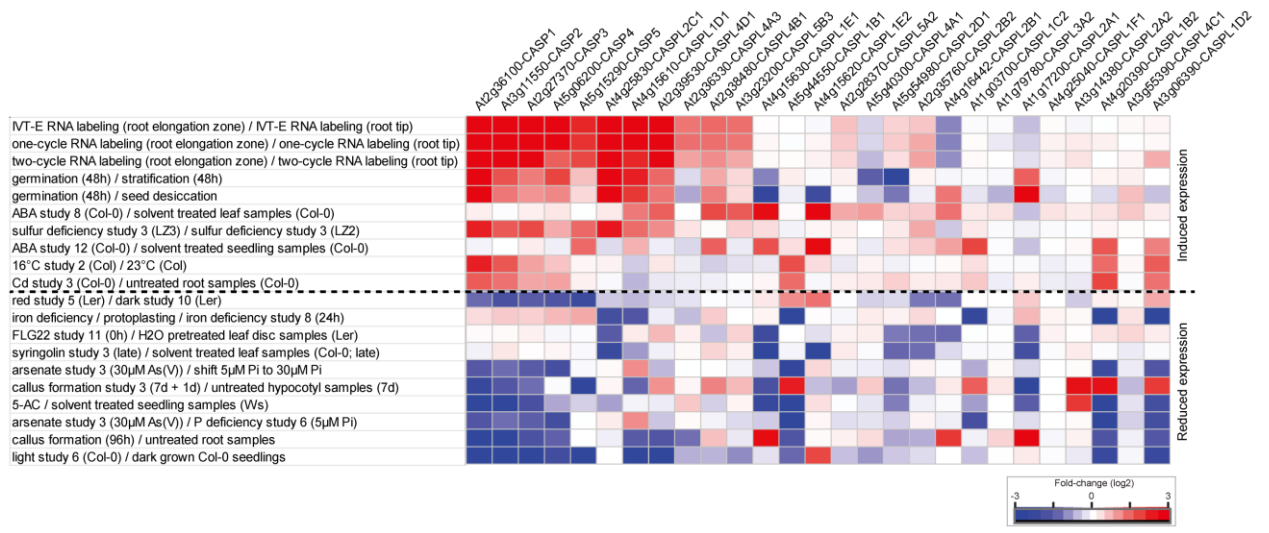

Figure 4

Table 1 Primers used in this study

| <b>Gene</b>              | <b>Forward primer</b>                                     | <b>Reverse primer</b>             |
|--------------------------|-----------------------------------------------------------|-----------------------------------|
| <i>CICASPL-RT</i>        | CACCAATTTCTCCTCCATT                                       | TCAAAAACGACATGACGCACCA            |
| <i>Atcaspl4c1-Screen</i> | GTTGCACCTTGCCTAAGTCTG (LP)<br>ATTTTGCCGATTCGGAAC (LBa1.3) | AGATTCGTGTTTGTGGCAAAC (RP)        |
| <i>Transient-CICASPL</i> | CACCAATTTCTCCTCCATT                                       | TCAAAAACGACATGACGCACCA            |
| <i>AtCASPL4C1-RT</i>     | GTAACGGCGAATCTCCGACTT                                     | AAACGAGAGCCAGTAATAAG              |
| <i>AtCASPL4C 1-qPCR</i>  | AGCTCAGAAACTCCGTCGAT                                      | CTGAAAGCGTCGAAATCGTA              |
| <i>CICASPL-qPCR</i>      | TGTTCAATCCACGATCTCCA                                      | AACGAGAGCCGTTGATTACG              |
| <i>CICASPL-GFP</i>       | AAAAAAGCAGGCTCGCACCAATTTCTCCTCCATT                        | AGAAAAGCTGGGTAATGAAAACGAGAGCCGTTG |
| <i>AtCASPL4C 1-GUS</i>   | TAACGACTCCACTCCAGCAT                                      | GCAGTCACGAGGCATCAA                |
| <i>CASP1-qPCR</i>        | CGAAGAAGAAGGGCTTTGTG                                      | GCTTGGAAGTGGAGGAACTG              |
| <i>CASP2-qPCR</i>        | CATGAAAGGCAAAGCTCCTC                                      | CTGCAACAATGGCAGCTAAA              |
| <i>CASP3-qPCR</i>        | ACTCATCGCAGCAATCACAG                                      | GTAGCCACCCACGATTGAGT              |
| <i>CASP4-qPCR</i>        | CATCAAAGGCAAAGCTCCTC                                      | AATGGCAGCTAAACGGAGAA              |
| <i>CASP5-qPCR</i>        | TTAAGGCTGGAAGGTCGTTG                                      | AGCGGTCTGATGAGCAGAAG              |
